# Supplementary material for: Transcatheter Mitral Repair for Functional Mitral Regurgitation According to Left Ventricular Function: A Real-Life Propensity-Score Matched Study
Source: PubMed Central journal article supplement (PMC7356666; doi:10.3390/jcm9061792), 2020-06-09
Supplement: jcm-09-01792-s001.pdf [file jcm-09-01792-s001.pdf]

**Table S1.** Baseline characteristics of global FMR group and propensity score matched group.

| Variable                              | Total FMR sample<br><i>n</i> = 535 | Matched group<br><i>n</i> = 288 | <i>p</i> |
|---------------------------------------|------------------------------------|---------------------------------|----------|
| Age (years)                           | 71.0 ± 10.8                        | 71.5 ± 9.8                      | 0.513    |
| Sex ( <i>n</i> (%))                   |                                    |                                 |          |
| Men                                   | 396(74.0)                          | 228(79.2)                       | 0.100    |
| Women                                 | 139(26.0)                          | 60(20.8)                        |          |
| BSA (m <sup>2</sup> )                 | 1.82 ± 0.20                        | 1.75 ± 0.36                     | <0.001   |
| IMC (Kg/m <sup>2</sup> )              | 27.2 ± 4.5                         | 26.5 ± 4.2                      | 0.030    |
| IMC ≥30 Kg/m <sup>2</sup>             | 124(23.2)                          | 54(18.8)                        | 0.141    |
| LVEF, %                               | 34.3 ± 12.5                        | 32.9 ± 11.8                     | 0.119    |
| Type 2 Diabetes Mellitus              | 189(35.3)                          | 96(33.3)                        | 0.566    |
| Ischemic Heart Disease                | 302(56.4)                          | 186(64.6)                       | 0.024    |
| Hypertension                          | 372(69.5)                          | 204(70.8)                       | 0.698    |
| Previous Cardiac Surgery              | 89(16.6)                           | 53(18.4)                        | 0.522    |
| Hemodialysis                          | 9(1.7)                             | 7(2.4)                          | 0.458    |
| NYHA Class                            |                                    |                                 |          |
| I                                     | 12(2.2)                            | 5(1.7)                          |          |
| II                                    | 59(11.0)                           | 28(9.7)                         | 0.810    |
| III                                   | 355(66.4)                          | 190(66.0)                       |          |
| IV                                    | 109(20.4)                          | 65(22.6)                        |          |
| STS Score                             | 3.7(1.8–6.7)                       | 3.9(1.3–6.8)                    | 0.846    |
| Active Endocarditis                   | 4(0.7)                             | 1(0.3)                          | 0.663    |
| Dyslipidemia                          | 305(57.0)                          | 169(58.7)                       | 0.644    |
| Critical Preoperative                 | 28(5.2)                            | 13(4.5)                         | 0.651    |
| Extracardiac Arteriopathy             | 73(13.6)                           | 46(16.0)                        | 0.365    |
| Unstable Angina                       | 16(3.0)                            | 10(3.5)                         | 0.706    |
| Atrial Fibrillation                   | 313(58.5)                          | 163(56.6)                       | 0.597    |
| Urgent Cardiac Surgery                | 49(9.2)                            | 22(7.6)                         | 0.459    |
| Smoker                                | 154(28.8)                          | 83(28.8)                        | 0.992    |
| Chronic Obstructive pulmonary disease | 111(20.7)                          | 56(19.4)                        | 0.658    |
| Recent Myocardial Infarction          | 41(7.7)                            | 22(7.6)                         | 0.990    |
| Permanent Pacemaker                   | 74(13.8)                           | 44(15.3)                        | 0.572    |
| Stroke                                | 58(10.8)                           | 34(11.8)                        | 0.675    |
| Percutaneous revascularization        | 210(39.3)                          | 129(44.8)                       | 0.124    |
| CABG                                  | 88(16.4)                           | 54(18.8)                        | 0.405    |
| Cardiac Resynchronization             | 83(15.5)                           | 42(14.6)                        | 0.723    |
| Prior TAVI                            | 13(2.4)                            | 8(2.8)                          | 0.763    |
| Poor Morbidity                        | 52(9.7)                            | 26(9.0)                         | 0.747    |
| Previous Heart Transplantation        | 29(5.4)                            | 14(4.9)                         | 0.731    |
| Prior Mitral annuloplasty             | 10(1.9)                            | 4(1.4)                          | 0.780    |
| Aortic Surgery                        | 15(2.8)                            | 7(2.4)                          | 0.752    |
| Technical Procedural Success          | 502(93.8)                          | 271(94.1)                       | 0.879    |

BMI, body mass index; BSA, Body surface area; CABG, coronary artery bypass graft; COPD, chronic obstructive pulmonary disease; LVEF, left ventricular ejection fraction; NYHA, New York Heart Association; TAVI, transcatheter aortic valve implantation. Values represent *n* (%), mean ± standard deviation or median [interquartile range].
